# Supplementary material
Source: MDPI journal article supplement (https://www.mdpi.com/1424-2818/11/9/169)
Supplement: s1 [file s1]

**Table S1.** Annotation of *Dicyrtomina saundersi* mitogenome. Nucleotide composition is calculated on the coding strand; spacers and overlaps (positive and negative numbers, respectively) are calculated with respect to the following gene.

| Gene           | A%   | C%   | G%   | T%   | Length<br>(bp) | Strand | Position      | Spacers/<br>overlaps | Star/Stop codons |
|----------------|------|------|------|------|----------------|--------|---------------|----------------------|------------------|
| <i>trnI</i>    | 30.3 | 9.1  | 19.7 | 40.9 | 66             | J      | 1-66          | 4                    |                  |
| <i>trnQ</i>    | 39.7 | 5.9  | 14.7 | 39.7 | 68             | N      | 138-71        | 6                    |                  |
| <i>trnM</i>    | 38.8 | 13.4 | 11.9 | 35.8 | 67             | J      | 145-211       | 0                    |                  |
| <i>nad2</i>    | 33.2 | 17.5 | 11.1 | 38.2 | 994            | J      | 212-1,205     | 0                    | ATG (Met) / T--  |
| <i>trnW</i>    | 43.5 | 10.1 | 7.2  | 39.1 | 69             | J      | 1,206-1,274   | 5                    |                  |
| <i>trnC</i>    | 31.7 | 15.0 | 16.7 | 36.7 | 60             | N      | 1,339-1,280   | -1                   |                  |
| <i>trnY</i>    | 35.8 | 9.4  | 17.0 | 37.7 | 52             | N      | 1,391-1,339   | 8                    |                  |
| <i>cox1</i>    | 29.1 | 18.3 | 16.8 | 35.8 | 1,542          | J      | 1,400-2,941   | 4                    | CTT (Leu) / TAA  |
| <i>trnLuua</i> | 40.4 | 12.3 | 15.8 | 31.6 | 57             | J      | 2,946-3,002   | -1                   |                  |
| <i>cox2</i>    | 32.9 | 17.9 | 14.2 | 34.9 | 684            | J      | 3,002-3,685   | 0                    | ATA (Met) / TAA  |
| <i>trnK</i>    | 35.7 | 20.0 | 14.3 | 30.0 | 70             | J      | 3,686-3,755   | 0                    |                  |
| <i>trnD</i>    | 43.8 | 7.8  | 12.5 | 35.9 | 64             | J      | 3,756-3,819   | 0                    |                  |
| <i>atp8</i>    | 40.9 | 15.7 | 12.6 | 30.8 | 162            | J      | 3,820-3,981   | -7                   | ATT (Ile) / TAA  |
| <i>atp6</i>    | 32.6 | 16.7 | 12.5 | 38.2 | 680            | J      | 3,975-4,654   | 0                    | ATG (Met) / TA-  |
| <i>cox3</i>    | 30.0 | 16.3 | 16.3 | 37.4 | 789            | J      | 4,655-5,443   | 3                    | ATG (Met) / TA-  |
| <i>trnG</i>    | 38.7 | 12.9 | 11.3 | 37.1 | 62             | J      | 5,447-5,508   | 0                    |                  |
| <i>nad3</i>    | 27.8 | 18.1 | 13.7 | 40.4 | 343            | J      | 5,509-5,851   | 0                    | ATT (Ile) / T--  |
| <i>trnA</i>    | 40.3 | 8.1  | 12.9 | 38.7 | 62             | J      | 5,852-5,913   | 0                    |                  |
| <i>trnR</i>    | 33.9 | 19.4 | 14.5 | 32.3 | 62             | J      | 5,914-5,975   | 7                    |                  |
| <i>trnN</i>    | 35.8 | 10.4 | 14.9 | 38.8 | 67             | J      | 5,983-6,049   | 1                    |                  |
| <i>trnSgcu</i> | 34.3 | 17.9 | 16.4 | 31.3 | 67             | J      | 6,051-6,117   | -2                   |                  |
| <i>trnE</i>    | 48.6 | 2.9  | 4.3  | 44.3 | 70             | J      | 6,116-6,185   | -1                   |                  |
| <i>trnF</i>    | 36.9 | 7.7  | 15.4 | 40.0 | 65             | N      | 6,249-6,185   | 0                    |                  |
| <i>nad5</i>    | 26.3 | 13.2 | 15.0 | 45.5 | 1,685          | N      | 7,934-6,250   | 0                    | ATT (Ile) / TA-  |
| <i>trnH</i>    | 37.5 | 4.7  | 17.2 | 40.6 | 64             | N      | 7,998-7,935   | 1                    |                  |
| <i>nad4</i>    | 22.3 | 12.8 | 16.4 | 48.6 | 1,335          | N      | 9,334-8,000   | 0                    | ATG (Met) / TAA  |
| <i>nad4L</i>   | 23.2 | 10.9 | 16.1 | 49.8 | 269            | N      | 9,603-9,335   | 2                    | ATT (Ile) / TA-  |
| <i>trnT</i>    | 49.2 | 6.2  | 7.7  | 36.9 | 65             | J      | 9,606-9,670   | 0                    |                  |
| <i>trnP</i>    | 40.0 | 6.2  | 13.8 | 40.0 | 65             | N      | 9,735-9,671   | 5                    |                  |
| <i>nad6</i>    | 35.1 | 16.8 | 10.6 | 37.5 | 455            | J      | 9,741-10,195  | 0                    | ATA (Met) / TA-  |
| <i>cob</i>     | 30.2 | 17.9 | 16.4 | 35.5 | 1,132          | J      | 10,196-11,327 | 0                    | ATG (Met) / T--  |
| <i>trnSuga</i> | 33.8 | 11.3 | 15.5 | 39.4 | 71             | J      | 11,328-11,398 | 1                    |                  |
| <i>nad1</i>    | 24.0 | 12.0 | 17.3 | 46.6 | 967            | N      | 12,366-11,400 | 1                    | ATT (Ile) / T--  |
| <i>trnLuag</i> | 33.3 | 4.5  | 13.6 | 48.5 | 66             | N      | 12,433-12,368 | 1                    |                  |
| <i>rrnL</i>    | 34.7 | 8.7  | 12.9 | 43.7 | 1,232          | N      | 13,666-12,435 | 0                    |                  |
| <i>trnV</i>    | 37.7 | 7.2  | 11.6 | 43.5 | 69             | N      | 13,735-13,667 | 0                    |                  |
| <i>rrnS</i>    | 42.8 | 13.8 | 9.5  | 33.9 | 747            | N      | 14,482-13,736 | 0                    |                  |
| A+T-rich       | 40.0 | 8.2  | 11.2 | 40.7 | 563            |        | 14,483-15,045 |                      |                  |
| total          | 38.5 | 15.7 | 12.8 | 33.1 | 15,045         |        |               |                      |                  |
