# Supplementary material
Source: MDPI journal article supplement (https://www.mdpi.com/1424-2818/11/9/169)
Supplement: s1 [file s1]

**Table S2.** Annotation of *Neelus murinus* mitogenome. Nucleotide composition is calculated on the coding strand; spacers and overlaps (positive and negative numbers, respectively) are calculated with respect to the following gene.

| Gene           | A%   | C%   | G%   | T%   | Length<br>(bp) | Strand | Positions     | Spacers/<br>overlaps | Star/Stop codons |
|----------------|------|------|------|------|----------------|--------|---------------|----------------------|------------------|
| <i>nad2</i>    | 33.3 | 21.6 | 7.5  | 37.5 | 1,000          | J      | 1-1,000       | 0                    | ATG (Met) / T--  |
| <i>trnW</i>    | 40.9 | 13.6 | 12.1 | 33.3 | 66             | J      | 1,001-1,066   | 1                    |                  |
| <i>trnC</i>    | 33.3 | 9.8  | 15.7 | 41.2 | 51             | N      | 1,118-1,068   | -1                   |                  |
| <i>trnY</i>    | 35.6 | 11.9 | 16.9 | 35.6 | 59             | N      | 1,176-1,118   | 0                    | ATG (Met) / TAA  |
| <i>cox1</i>    | 27.5 | 25.0 | 15.8 | 31.8 | 1533           | J      | 1,177-2,709   | 1                    |                  |
| <i>trnLuua</i> | 34.9 | 11.1 | 14.3 | 39.7 | 63             | J      | 2,711-2,773   | 0                    |                  |
| <i>cox2</i>    | 34.7 | 23.1 | 9.8  | 32.4 | 673            | J      | 2,774-3,446   | 0                    | ATC (Ile) / T--  |
| <i>trnK</i>    | 35.3 | 11.8 | 13.2 | 39.7 | 68             | J      | 3,447-3,514   | 0                    |                  |
| <i>trnD</i>    | 41.0 | 8.2  | 11.5 | 39.3 | 61             | J      | 3,518-3,578   | 3                    |                  |
| <i>atp8</i>    | 35.8 | 20.8 | 5.7  | 37.7 | 162            | J      | 3,581-3,742   | -7                   | ATT (Ile) / TAA  |
| <i>atp6</i>    | 29.4 | 25.4 | 10.5 | 34.7 | 672            | J      | 3,736-4,407   | -46                  | ATG (Met) / TAA  |
| <i>cox3</i>    | 29.6 | 25.1 | 13.7 | 31.7 | 837            | J      | 4,362-5,198   | 1                    | ATA (Met) / TAA  |
| <i>trnG</i>    | 32.3 | 16.1 | 9.7  | 41.9 | 62             | J      | 5,200-5,261   | 0                    |                  |
| <i>nad3</i>    | 28.1 | 24.6 | 10.5 | 36.8 | 345            | J      | 5,262-5,606   | 3                    | ATT (Ile) / TAA  |
| <i>trnA</i>    | 43.5 | 8.1  | 11.3 | 37.1 | 62             | J      | 5,610-5,671   | 4                    |                  |
| <i>trnR</i>    | 28.3 | 21.7 | 21.7 | 28.3 | 60             | J      | 5,676-5,735   | 2                    |                  |
| <i>trnN</i>    | 26.7 | 16.7 | 21.7 | 35.0 | 60             | J      | 5,732-5,791   | 0                    |                  |
| <i>trnSgcu</i> | 33.3 | 25.0 | 16.7 | 25.0 | 60             | J      | 5,792-5,851   | 0                    |                  |
| <i>trnE</i>    | 34.2 | 11.4 | 16.5 | 38.0 | 79             | J      | 5,852-5,930   | -16                  |                  |
| <i>trnF</i>    | 36.9 | 9.2  | 20.0 | 33.8 | 65             | N      | 5,977-5,913   | 1                    |                  |
| <i>nad5</i>    | 22.9 | 10.8 | 24.9 | 41.4 | 1705           | N      | 7,683-5,979   | -2                   | ATT (Ile) / ---  |
| <i>trnH</i>    | 37.5 | 6.3  | 20.3 | 35.9 | 64             | N      | 7,745-7,682   | -2                   |                  |
| <i>nad4</i>    | 22.1 | 9.7  | 25.8 | 42.4 | 1344           | N      | 9,087-7,744   | 0                    | ATG (Met) / TAG  |
| <i>nad4L</i>   | 21.5 | 8.4  | 25.9 | 44.2 | 274            | N      | 9,361-9,088   | 2                    | ATG (Met) / ---  |
| <i>trnT</i>    | 40.0 | 16.7 | 11.7 | 31.7 | 60             | J      | 9,364-9,423   | -1                   |                  |
| <i>trnP</i>    | 35.0 | 6.7  | 21.7 | 36.7 | 60             | N      | 9,482-9,423   | 1                    |                  |
| <i>nad6</i>    | 29.2 | 25.5 | 8.7  | 36.6 | 486            | J      | 9,484-9,969   | 0                    | ATT (Ile) / TAA  |
| <i>cob</i>     | 29.2 | 25.5 | 8.7  | 36.6 | 1132           | J      | 9,970-11,101  | 0                    | ATG (Met) / T--  |
| <i>trnSuga</i> | 36.1 | 11.1 | 15.3 | 37.5 | 72             | J      | 11,102-11,173 | 0                    |                  |
| <i>nad1</i>    | 20.7 | 10.0 | 23.8 | 45.5 | 922            | N      | 12,095-11,174 | 3                    | ATA (Met) / T--  |
| <i>trnLuag</i> | 41.5 | 6.2  | 15.4 | 36.9 | 65             | N      | 12,163-12,099 | 0                    |                  |
| <i>rrnL</i>    | 33.2 | 7.7  | 18.2 | 41.0 | 1107           | N      | 13,270-12,164 | 0                    |                  |
| <i>trnV</i>    | 32.3 | 12.9 | 21.0 | 33.9 | 62             | N      | 13,332-13,271 |                      |                  |
| total          | 35.4 | 23.1 | 10.9 | 30.6 | 13,992         |        |               |                      |                  |
